# Supplementary material for: Amino acid 159 of the envelope protein affects viral replication and T-cell infiltration by West Nile virus in intracranial infection
Source: PubMed Central journal article supplement (PMC7189269; doi:10.1038/s41598-020-64199-7), 2020-04-28
Supplement: 41598_2020_64199_MOESM1_ESM.pdf [file 41598_2020_64199_MOESM1_ESM.pdf]

**Amino acid 159 of the envelope protein affects viral replication and T-cell infiltration by West Nile virus in intracranial infection**

Shintaro Kobayashi<sup>1\*</sup>, Chisato Kaneko<sup>1</sup>, Ryoko Kawakami<sup>1</sup>, Rie Hasebe<sup>2</sup>, Hirofumi Sawa<sup>3, 4, 5</sup>, Kentaro Yoshii<sup>1</sup>, Hiroaki Kariwa<sup>1</sup>

1. Laboratory of Public Health, Faculty of Veterinary Medicine, Hokkaido University, N18, W9, Kita-ku, Sapporo, 060-0818, Japan
2. Biomedical Animal Research Laboratory, Institute for Genetic Medicine, Hokkaido University, N15, W7, Kita-ku, Sapporo, 060-0815, Japan
3. Division of Molecular Pathobiology, Research Center for Zoonosis Control, Hokkaido University, N20, W10, Kita-ku, Sapporo, 001-0020, Japan
4. Global Institution for Collaborative Research and Education (GI-CoRE), Hokkaido University, Sapporo, Japan
5. Global Virus Network, Baltimore, MD, USA

# Supplementary Information

## Supplementary Figure S1

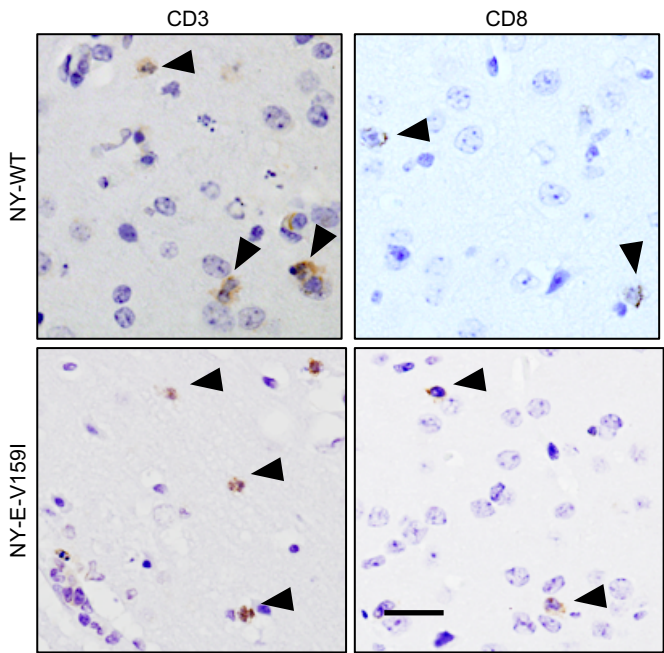

**Supplementary Figure S1:** Images of sections of the cerebral cortex. C57BL/6 mice were inoculated intracranially with 1 pfu NY-WT or NY-E-V159I. The sections were immunostained for CD3 or CD8. Black arrowheads, CD3-positive cells or CD8-positive cells. Scale bar, 20  $\mu$ m.

# Supplementary Figure S2

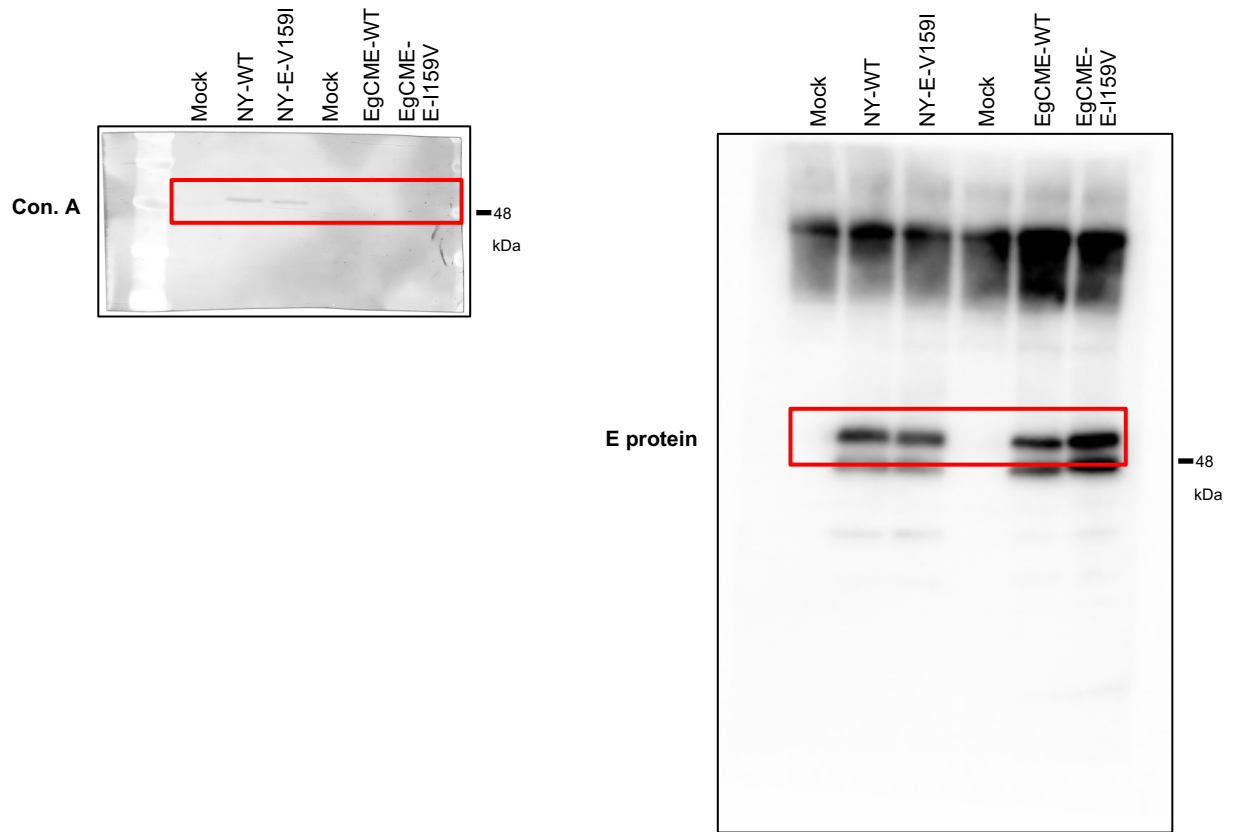

**Supplementary Figure S2:** Full-length blots of Figure 1C. Red-boxed regions were shown in Fig. 1C

# Supplementary Figure S3

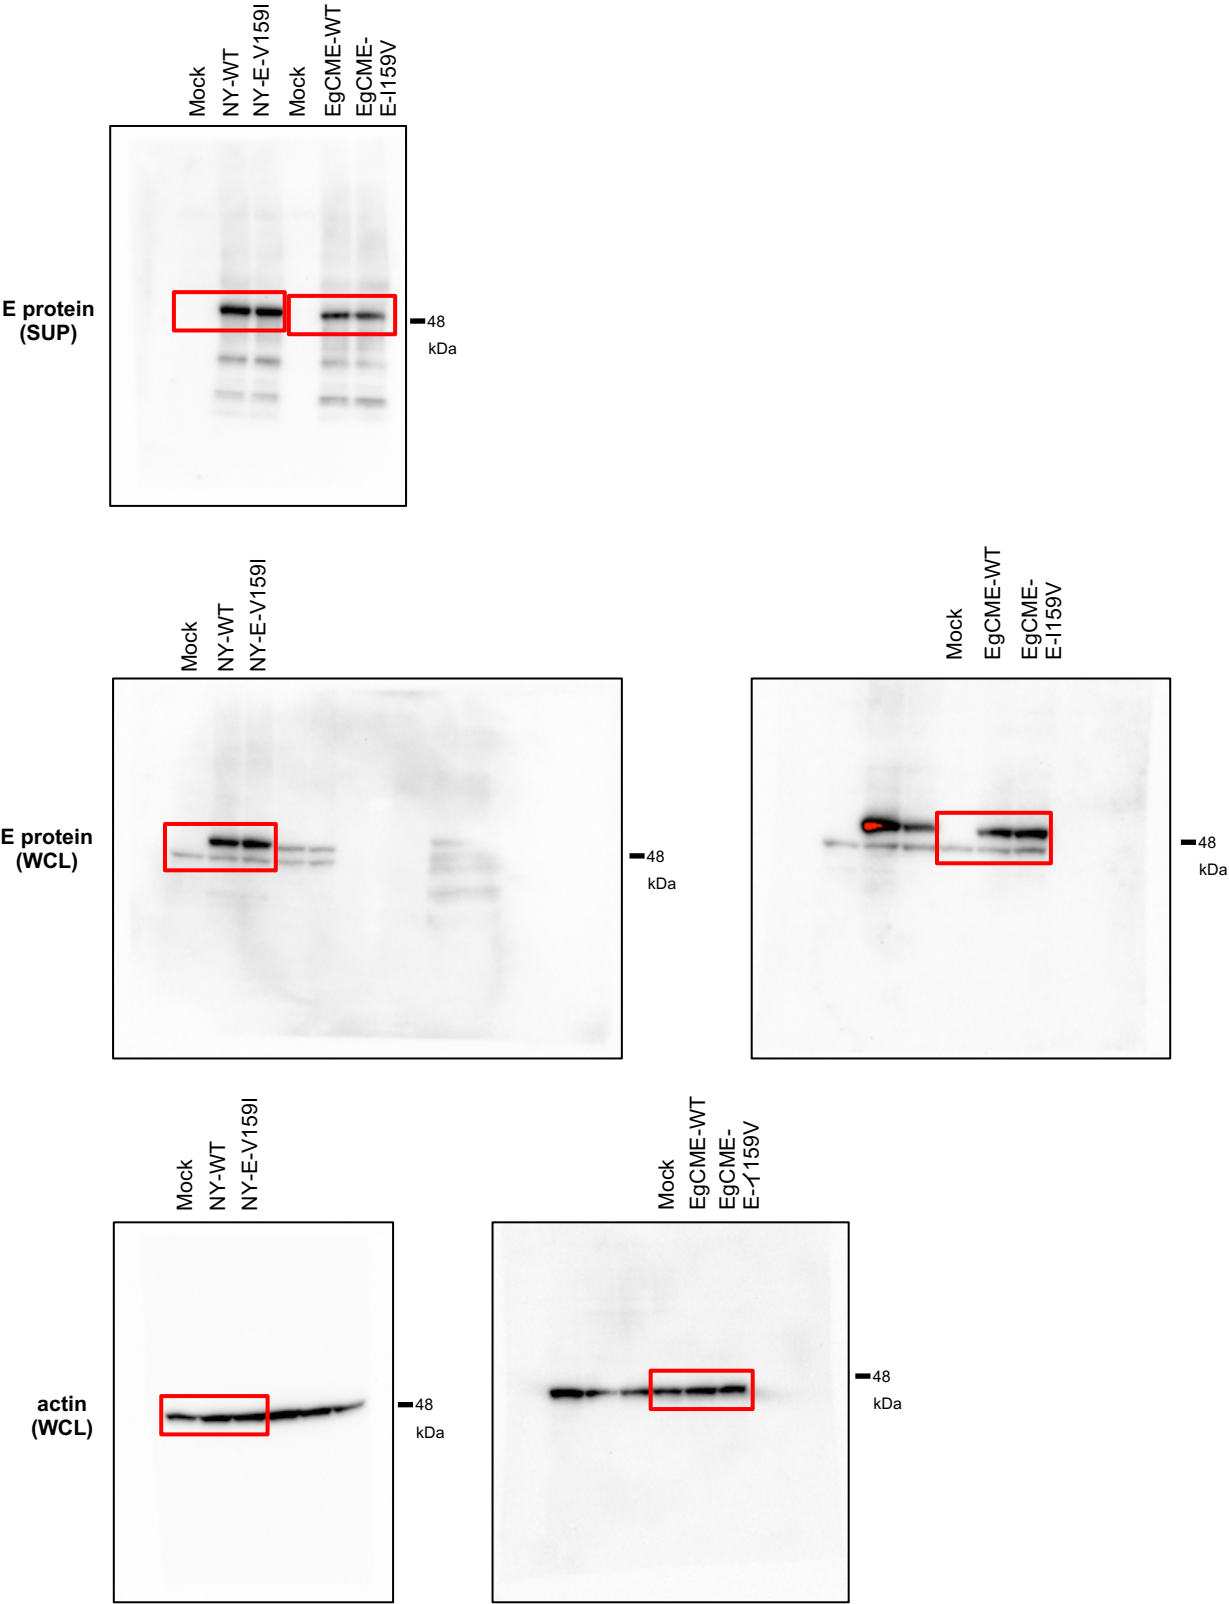

Supplementary Figure S3: Full-length blots of Figure 2B. Red-boxed regions were shown in Fig. 2B
